# Supplementary material for: Preparation and characterization of titania-entrapped silica hollow particles: effective dye removal and evidence of selectivity
Source: Royal Society of Chemistry journal article supplement (doi:10.1039/c3cp50872b), 2013-01-01
Supplement: c3cp50872b.pdf [file c3cp50872b.pdf]

## Supporting materials

**S1.** Magnified TEM image of S $\phi$ T displays the TiO<sub>2</sub> particle size in the range under 10 nm.

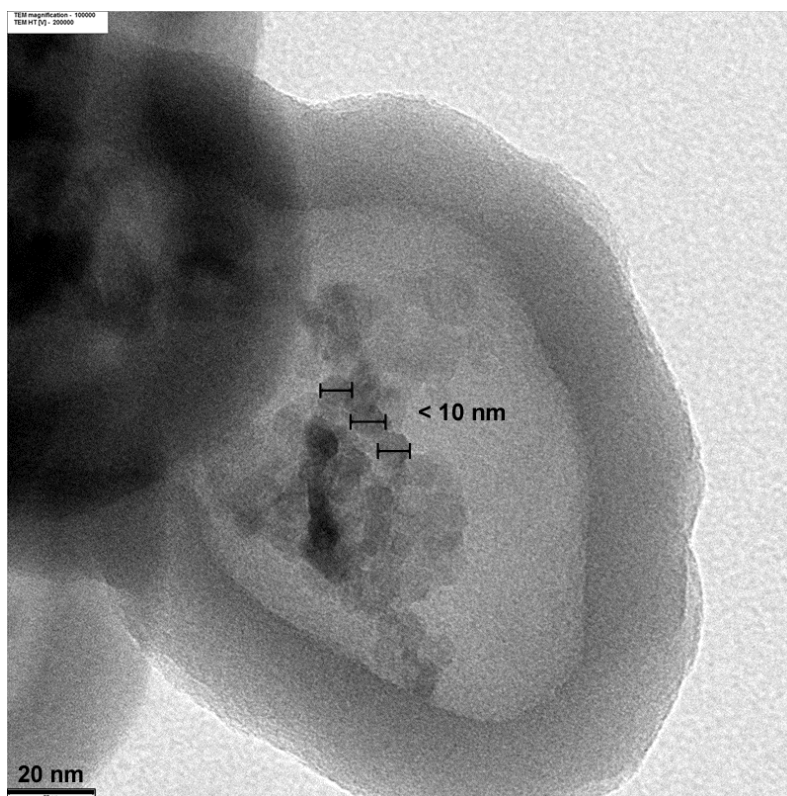

**S2. Photo images of the as-synthesized nanomaterial powder showing the color change from brown of S/C/T to white of S $\phi$ T after calcination process.**

S/C/T: With carbon under silica layer (brown).

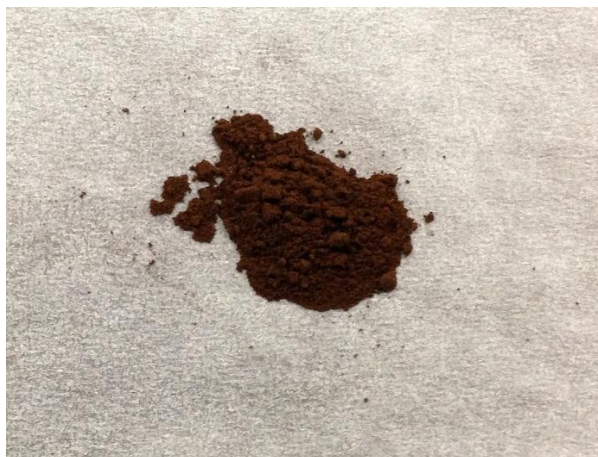

S $\phi$ T: When carbon has been removed (white).

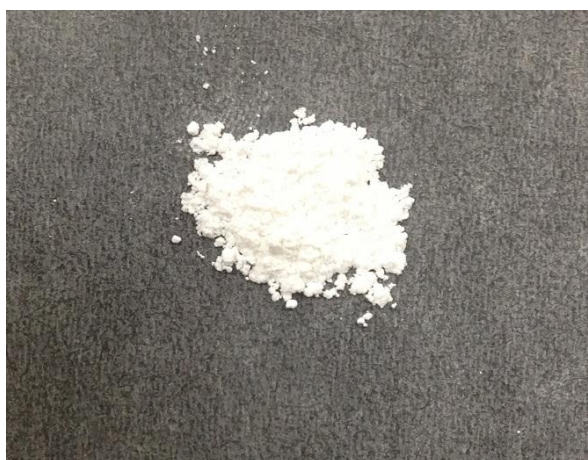

**S3. EDX results comparing the presence of carbon signal in S/C/T and S $\phi$ T.**

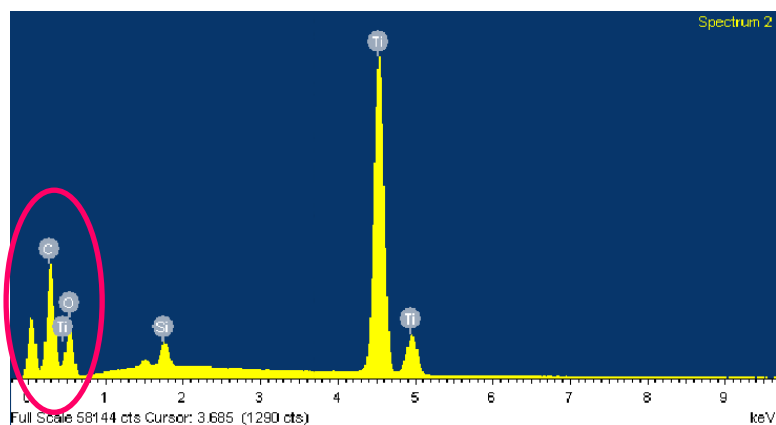

**S/C/T:** EDX data shows the carbon signal in the S/C/T sample.

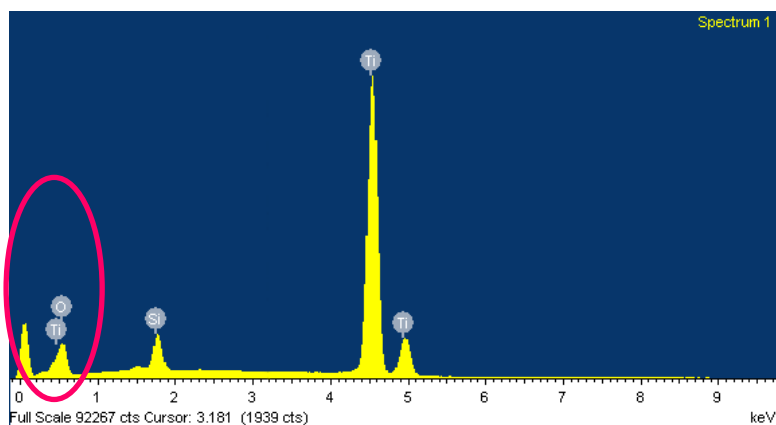

**S $\phi$ T:** Carbon signal could not be detected.

**Percent weight content of all elements from EDX analysis**

| Samples                  | % Weight |      |       |       |
|--------------------------|----------|------|-------|-------|
|                          | O        | Si   | Ti    | C     |
| S/C/T <sup>#1</sup>      | 31.80    | 1.43 | 37.77 | 28.99 |
| S/C/T <sup>#2</sup>      | 30.86    | 2.35 | 45.28 | 21.52 |
| S/C/T <sup>#3</sup>      | 36.47    | 1.82 | 28.73 | 32.98 |
| S/C/T <sup>#4</sup>      | 37.62    | 2.43 | 31.60 | 28.35 |
| Average                  | 34.19    | 2.01 | 35.85 | 27.96 |
| S $\phi$ T <sup>#1</sup> | 37.42    | 3.83 | 58.74 | -     |
| S $\phi$ T <sup>#2</sup> | 38.86    | 3.98 | 57.16 | -     |
| S $\phi$ T <sup>#3</sup> | 36.48    | 2.70 | 60.82 | -     |
| S $\phi$ T <sup>#4</sup> | 41.24    | 2.96 | 55.79 | -     |
| Average                  | 38.50    | 3.37 | 58.13 | -     |

#### **S4. Interpretation of IR spectra**

The IR spectrum of silica are generally observed to consist of strong signals at approximately 1100, 800, and 460  $\text{cm}^{-1}$ , which are attributed to the Si-O-Si antisymmetric and symmetric stretching, as well as bending vibration [Ref.34]. The range at 1125-1010  $\text{cm}^{-1}$  is the characteristic of Si-O-Si antisymmetric stretching vibration. According to Launer [Ref.27], “disiloxanes and small-ring cyclosiloxanes would appear as a single band”. However, “as the siloxane chains become longer and branched, the Si-O-Si absorption becomes broader and more complex.” Broad signal of Si-O-Si stretching of amorphous silica is widely accepted among scientists in this research area. The similar conclusion can be simply found in their reports [Ref.12, 28, 29, 30].

#### **S5. Residue of dye after photocatalysis.**

The subtraction of  $C/C_0$  adsorption rate of the Cycle 1 ( $1.0-0.6 = 0.4$ ) by that of Cycle 2 ( $1.0-0.85 = 0.15$ ) in Fig.10 shows that about  $(0.4-0.15) 0.25$  or 25% of the residual MB was still adsorbed on S $\phi$ T at this irradiation period, and this value continued to be steady in the next recycle run, Cycle 3.
